# Supplementary material
Source: Springer Nature journal article supplement (https://www.springermedizin.de/resource/supplementary/12960_2003_12_MOESM5_ESM.pdf/9569728)
Supplement: MOESM5 [file 9569728]

**No. of beds****No. of doctors**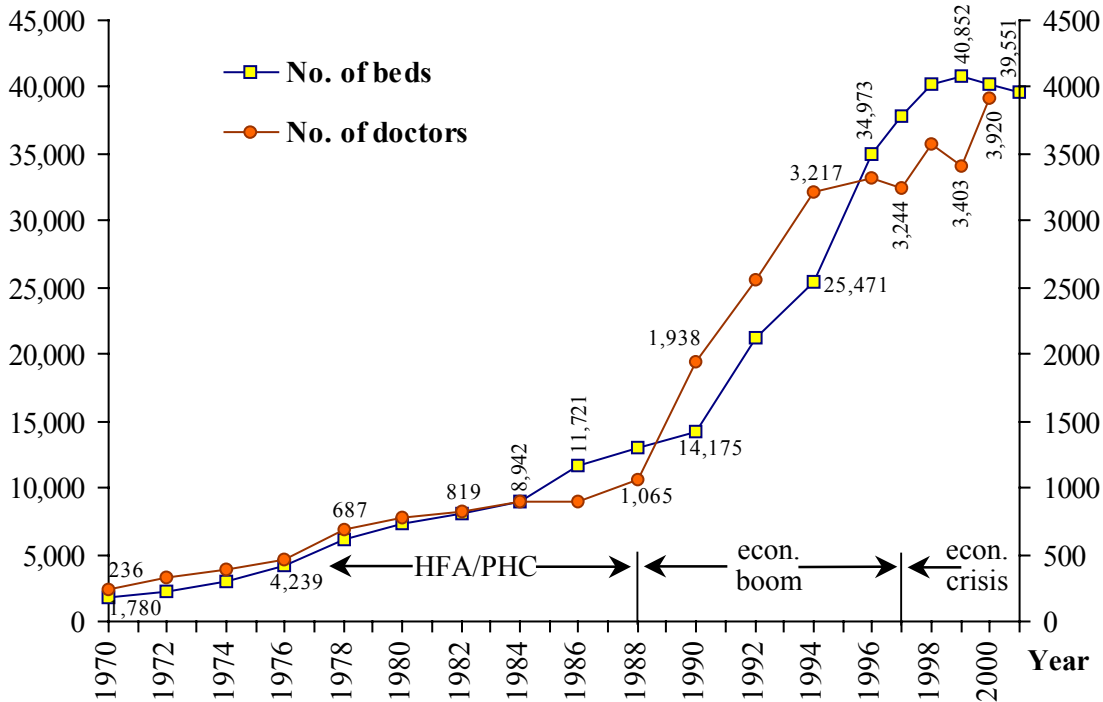

Source: Medical Registration Division, Bureau of Health Policy and Plan, MoPH
